# Supplementary material for: Puroindoline allelic diversity in Indian wheat germplasm and identification of new allelic variants
Source: PubMed Central journal article supplement — Breed Sci. 2015 Sep 1;65(4):319–26. doi: 10.1270/jsbbs.65.319 (PMC4542932; doi:10.1270/jsbbs.65.319), 2015-09-01
Supplement: 65_319_1.pdf [file 65_319_1.pdf]

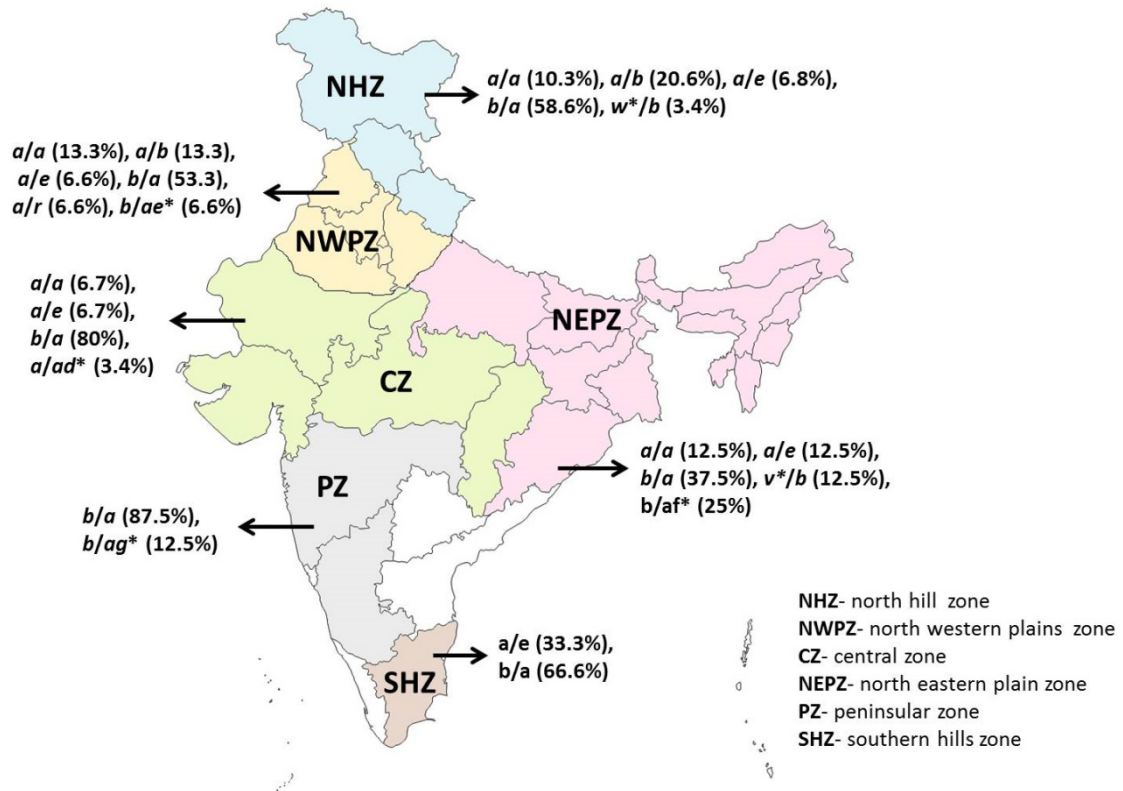

**Supplemental Fig. 1.** Frequency distribution of different allelic combinations in different agro-climatic zones of India.

*a/a* = *Pina-D1a*, *Pinb-D1a*

*a/b* = *Pina-D1a*, *Pinb-D1b*

*b/a* = *Pina-D1b*, *Pinb-D1a*

*a/e* = *Pina-D1a*, *Pinb-D1e*

*a/r* = *Pina-D1a*, *Pinb-D1r*

*v\*/a* = *Pina-D1v\**, *Pinb-D1a*

*w\*/a* = *Pina-D1w\**, *Pinb-D1a*

*a/ad\** = *Pina-D1a*, *Pinb-D1ad\**

*b/ae\** = *Pina-D1b*, *Pinb-D1ae\**

*b/af\** = *Pina-D1b*, *Pinb-D1af\**

*b/ag\** = *Pina-D1b*, *Pinb-D1ag\**
