# Supplementary material for: Puroindoline allelic diversity in Indian wheat germplasm and identification of new allelic variants
Source: PubMed Central journal article supplement — Breed Sci. 2015 Sep 1;65(4):319–26. doi: 10.1270/jsbbs.65.319 (PMC4542932; doi:10.1270/jsbbs.65.319), 2015-09-01
Supplement: 65_319_2.pdf [file 65_319_2.pdf]

Supplemental Table 1. Indian wheat cultivars used for puroindolines gene diversity study

|               |                 |              |                |             |
|---------------|-----------------|--------------|----------------|-------------|
| 8A            | CDWR9504        | CPAN4208     | DHT20          | DL2186      |
| A115          | CDWR95101       | CPAN4209     | DHT21          | DL2305      |
| A90           | CDWR95102       | CPAN4210     | DHT22          | DL277       |
| AC240         | CDWR95104       | CPAN4212     | DHT23          | DL3371      |
| AC82          | CDWR95105       | CPAN4213     | DHT24          | DL5472      |
| ACC.NO.8226   | CDWR9529        | CPAN4214     | DHT25          | DL7843      |
| AGRALOCAL     | CHHOTILERMA     | CPAN4216     | DHT26          | DL7882      |
| AJANTA        | CIMMYT          | CPAN4217     | DHT27          | DL8033      |
| AKAW2264      | CITR4910        | CPAN4218     | DHT28          | DLRRI5      |
| AKAW4627      | CITR5420        | CPAN4219     | DHT29          | DLRRL16     |
| AKW1071       | COOK            | CPAN4220     | DHT3           | DLRRL32     |
| AKW318        | CPAN1796        | CPAN4221     | DHT30          | DLRRL34     |
| AKW3294       | CPAN1968        | CPAN4222     | DHT32          | DLRRL35     |
| AKW370        | CPAN2092        | CPAN4223     | DHT33          | DUCKSEL     |
| AKW381        | CPAN3004        | D134         | DHT34          | DURANTI     |
| AM2006        | CPAN3016        | DBW14        | DHT35          | DURGAPURA65 |
| B.SEL166      | CPAN3046        | DBW16        | DHT36          | DW21        |
| BANDASHARBATI | CPAN4107        | DBW17        | DHT37          | DW694       |
| BARCHEALOCAL  | CPAN4108        | DBW39        | DHT38          | DW698       |
| BAROW         | CPAN4135        | DBW46        | DHT39          | DW774       |
| BAWAJI        | CPAN4136        | DBW49        | DHT4           | DW776       |
| BAXI26        | CPAN4137        | DBW50        | DHT40          | DW812       |
| BOBWHITE      | CPAN4138        | DBW51        | DHT42          | DW853       |
| BR291         | CPAN4196        | DBW52        | DHT43          | DWR1        |
| BW/SH2        | CPAN4197        | DHT1         | DHT44          | DWR16       |
| BW/SH35       | CPAN4198        | DHT10        | DHT45          | DWR195      |
| BW/SH43       | CPAN4199        | DHT11        | DHT46          | DWR21       |
| C16           | CPAN4200        | DHT12        | DHT47          | DWR24       |
| C285          | CPAN4202        | DHT13        | DHT48          | DWR39       |
| C286          | CPAN4203        | DHT14        | DHT5           | EGPSN3RD22  |
| C306          | CPAN4204        | DHT15        | DHT7           | EGPSN3RD24  |
| CBW38(I)      | CPAN4205        | DHT16        | DHT8           | EGPSN3RD26  |
| CDWR9425      | CPAN4206        | DHT17        | DL1532(KUNDAN) | EGPSN3RD31  |
| CDWR9426      | CPAN4207        | DHT2         | DL2051         | EGPSN3RD4   |
| EGPSN3RD49    | HD2189          | HD3014       | HPW315         | HUW612      |
| EGPSN3RD55    | HD2236(KSHIPRA) | HD3016       | HPW39          | HUW616      |
| EGPSN3RD56    | HD2270          | HDR77        | HPW42          | HUW620      |
| EGPSN3RD65    | HD2278          | HI1077       | HPW89          | HUW625      |
| EGPSN3RD70    | HD2281          | HI1287       | HS109717       | HUW626      |
| GL1           | HD2285(GOBIND)  | HI1418       | HS113864       | HUW629      |
| GL5           | HD2307          | HI1454       | HS207          | HUW7        |
| GW116         | HD2329          | HI1500       | HS240          | HW1076      |
| GW120         | HD2380          | HI1531       | HS27           | HW1078      |
| GW173         | HD2385          | HI1544       | HS277          | HW1085      |
| GW18          | HD2402          | HI1560       | HS295          | HW2004      |
| GW190         | HD2501          | HI1563       | HS365          | HW2044      |
| GW244         | HD2643          | HI784(SWATI) | HS375          | HW2045      |
| GW273         | HD2687          | HI8073       | HS420          | HW5207      |
| GW322         | HD2733          | HI8078       | HS505          | HW52071     |

|               |            |           |            |                |
|---------------|------------|-----------|------------|----------------|
| GW366         | HD2781     | HI977     | HS507      | HW5209         |
| GW391         | HD2824     | HP1102    | HS508      | HW5210         |
| GW40          | HD2864     | HP1493    | HS511      | HW657          |
| GW406         | HD2888     | HP1633    | HS512      | HW741          |
| GW496         | HD29       | HP1731    | HS513      | HY12           |
| GW503         | HD2932     | HP1761    | HS521      | HY5            |
| GW89          | HD2967     | HP1913    | HS522      | HYB11          |
| H867          | HD2982     | HP3288    | HS523      | HYB633         |
| H943          | HD2983     | HP803     | HS62       | HYB65          |
| HB10062       | HD2985     | HP833     | HS86       | IC26756        |
| HB208         | HD2987     | HPW147    | HUW12      | IC4937         |
| HBW42         | HD2997     | HPW184    | HUW206     | IC8572         |
| HD1925        | HD2998     | HPW251    | HUW213     | IWP72          |
| HD1941(HIRA)  | HD30       | HPW289    | HUW219     | J17            |
| HD1949(MOTI)  | HD3002     | HPW296    | HUW229     | J24            |
| HD1982(JANAK) | HD3003     | HPW297    | HUW234     | J405           |
| HD2009(ARJUN) | HD3007     | HPW30     | HUW37      | JWS17(SWAPNIL) |
| HD2135        | HD3012     | HPW308    | HUW468     | K0307          |
| HD2177        | HD3013     | HPW309    | HUW55      | K0607          |
| K0616         | MP1203(I)  | NP745     | PBW596(I)  | SARBATISONARA  |
| K0617         | MP1218     | NP770     | PBW610     | SONALIKA       |
| K0707         | MP1224     | NP771     | PBW612     | SONARA         |
| K0708         | MP1225     | NP792     | PBW613     | SONORA64       |
| K0710         | MP3224     | NP799     | PBW617     | TAWA267        |
| K0711         | MP4010     | NP809     | PBW618     | TL2942         |
| K0716         | MP4080     | NP818     | PBW620     | TL2963         |
| K53           | MP4106     | NP823     | PBW621     | TL2966         |
| K65           | NARBADA4   | NP824     | PBW623     | UAS304         |
| K7410         | NARMADA112 | NP825     | PBW624     | UAS305         |
| K78           | NARMADA195 | NP836     | PBW625     | UAS315         |
| K7903         | NEPAL10    | NP839     | PBW626     | UAS316         |
| K8020         | NEPAL4     | NP852     | PBW628     | UP1109         |
| K8027         | NEPAL40    | NP884     | PBW629     | UP115          |
| K816          | NI179      | NP890     | PBW65      | UP2003         |
| K8434         | NI345      | NW1076    | PI143783   | UP2121         |
| K88(K8804)    | NI5439     | NW2036    | PV18       | UP215          |
| K8962         | NI5643     | NW4035    | RAJ1114    | UP2338         |
| K9006         | NIAW1395   | PBCTYPE11 | RAJ1482    | UP2425         |
| K9162         | NIAW1415   | PBN142    | RAJ2184    | UP2565         |
| K9351         | NIAW301    | PBN51     | RAJ3077    | UP262          |
| K9533         | NIAW34     | PBW12     | RAJ3765    | UP2744         |
| K9644         | NIAW917    | PBW120    | RAJ3777    | UP2771         |
| KENPHAD25     | NP101      | PBW138    | Raj4037    | UP2772         |
| KHARCHIA65    | NP111      | PBW154    | Raj4083    | UP368          |
| KRL14         | NP114      | PBW175    | Raj4120(I) | UTKALIKA       |
| KRL19         | NP120      | PBW226    | Raj4176    | VL401          |
| KSML3         | NP165      | PBW343    | RAJ821     | VL404          |
| LALBAHADUR    | NP4        | PBW373    | RSP561     | VL421          |
| LOK1          | NP710      | PBW396    | RW3016     | VL616          |
| MACS6222      | NP715      | PBW443    | RW346      | VL738          |
| MACS6273      | NP718      | PBW54     | RW3673     | VL804          |

|           |        |           |            |           |
|-----------|--------|-----------|------------|-----------|
| MLKS11    | NP721  | PBW550    | SAFEDLARMA | VL829     |
| MONDHYA32 | NP737  | PBW590(I) | SAGARIKA   | VL832     |
| VL892     | VL935  | WH1080    | WL410      | WWONIR226 |
| VL907     | WG357  | WH1081    | WL444      | WWONIR228 |
| VL916     | WG377  | WH147     | WL711      | WWONIR232 |
| VL920     | WH1021 | WH291     | WWONIR205  | WWONIR240 |
| VL921     | WH1061 | WH416     | WWONIR207  | WWONIR252 |
| VL924     | WH1062 | WH533     | WWONIR213  | WWONIR258 |
| VL925     | WH1063 | WH542     | WWONIR215  | WWONIR268 |
| VL933     | WH1073 | WH711     | WH1076     | WL1562    |
| VL934     |        |           |            |           |

Supplemental Table 2. Indian wheat cultivars and their pedigree used for sequencing puroindoline genes

| S. no. | Variety name    | Pedigree                                                             | Year of release | Institute/ place of release |
|--------|-----------------|----------------------------------------------------------------------|-----------------|-----------------------------|
| 1      | A115            | A 113'S'                                                             | 1915-18         | AKOLAS                      |
| 2      | A90             | SEL.PUNJAB LOCAL LALKUSURWALA                                        | 1919            | LYALLPUR                    |
| 3      | AGRALOCAL       | LANDRACE                                                             | —               | UTTAR PRADESH               |
| 4      | AKW318          | S 308/NI5439                                                         | 1991            | AKOLA                       |
| 5      | C306            | RGN/CSK3//2*C591/3/C127/N14//C281                                    | 1965            | PAU/DPB HR                  |
| 6      | CHHOTILE RMA    | LR 64 'S'//HUAR                                                      | 1969            | NEW DELHI                   |
| 7      | DBW17           | CMH79A.95/3*CNO 79//RAJ3777                                          | 2006            | DWR, Karnal                 |
| 8      | DBW39           | ATTILA/HUI                                                           | 2010            | DWR, Karnal                 |
| 9      | DBW46           | PBW343/INQ21                                                         | 2011-12         | DWR KARNAL                  |
| 10     | DHT12           | GERMPLASM                                                            | —               | —                           |
| 11     | DHT23           | GERMPLASM                                                            | —               | —                           |
| 12     | DLLR35          | GERMPLASM                                                            | —               | —                           |
| 13     | GW89            | KAL'S/LR 64A//SKA                                                    | 1984            | VIJAPUR                     |
| 14     | H867            | GERMPLASM                                                            | —               | —                           |
| 15     | HB208           | SPO/MTA/MQ/2*RNW//3/PJ'S/P14/KT54B                                   | 1981            | BHOWALI                     |
| 16     | HD2135          | H41-3 (HD1962*(R4870*K65                                             | 1975            | NEW DELHI                   |
| 17     | HD2967          | ALD/COC//URES/HD2160m/HD2278                                         | 2011            | IARI NEWDELHI               |
| 18     | HD3002          | UP2433/HD 2687                                                       | 2008-09         | NEW DELHI                   |
| 19     | HD3014          | C306/STMPALLI//HW2003/WR956//DL153-2                                 | 2008-09         | NEW DELHI                   |
| 20     | HPW251          | WW24/LEHMI/P2-II149                                                  | 2007            | PALAMPUR                    |
| 21     | HPW296          | PUNJAB96-PALAMPUR CSKHPKV                                            | 2007-08         | PALAMPUR CSKHPKV            |
| 22     | HS113           | GERMPLASM                                                            | —               | SHIMLA                      |
| 23     | HS1138          | E 4870/SONALIKA                                                      | 1978            | SHIMLA                      |
| 24     | HS277           | KAVKAZ/CIGUENA                                                       | 1992            | SHIMLA                      |
| 25     | HS295           | CQT/AZ//IA 555/ALDML'S'/NAFN/4/PJN'S'/PEL1276.69                     | 1992            | SHIMLA                      |
| 26     | HS490           | HS364/HPW114//HS240/HS346                                            | 2007            | SHIMLA                      |
| 27     | HS505           | ATTILA*219/K7/BAGE//FN/3/BZA/4/TRM/5/AL DAN/6/SERI/7/VEE3#10/8/DPATA | —               | SHIMLA                      |
| 28     | HS508           | ATTILA/3/VORRONA/CNO79//KAUZ                                         | 2008-09         | SHIMLA                      |
| 29     | HS512           | BAU/3/GLEN//MAYA/NAC/4/NL456/VEE#5                                   | 2008-09         | SHIMLA-TUTIKANDI, IARI      |
| 30     | HS513           | HS413/HD2643//HW2044 (GERMPLASM)                                     | —               | SHIMLA                      |
| 31     | HUW12           | NP 876 / CIANI 66                                                    | 1980            | VARANSI                     |
| 32     | HUW612          | HUW202/HUW300//HUW395                                                | —               | VARANSI                     |
| 33     | HW5210          | HW3081//HW2084                                                       | 1988            | PKV-AK                      |
| 34     | HYB11           | A 115/WIS 245'S'                                                     | 1953-54         | POWERKHEDA                  |
| 35     | HYB65           | GB-AUS/A115                                                          | 1976            | POWERKHEDA                  |
| 36     | K0307(SHATABDI) | K 8321/UP 2003                                                       | 2006            | KANPUR                      |

|    |                 |                                         |         |               |
|----|-----------------|-----------------------------------------|---------|---------------|
| 37 | K0607           | HUW468/HD2402                           | 2011    | KANPUR        |
| 38 | K0710           | PBW343/K9162                            | 2011    | KANPUR        |
| 39 | K53             | SEL.LOCAL OF JHANSI                     | 1951    | KANPUR        |
| 40 | K65             | C591/NP773                              | 1964    | KANPUR        |
| 41 | K816            | CNO SIB//SN64/KLRE/3/8156               | 1974    | KANPUR        |
| 42 | KSML3           | MULTILINE(KALYANSONA) OF SIX COMPONENTS | 1981    | PAU           |
| 43 | LOK1            | S308/S331                               | 1981    | SANOSARA      |
| 44 | MACS6222        | HD2189*2/MACS2496                       | 2009-10 | ARI PUNE      |
| 45 | NAPHAL          | LANDRACE                                | —       | DWR KARNAI    |
| 46 | NARBADA 4       | GB-AVS/N14/3/PW5//TH/NP165              | 1971    | POWERKHEDA    |
| 47 | NARMAD A112     | HY65/C306                               | 1982    | POWERKHEDA    |
| 48 | NARMAD A195     | C306/HY65(SELECTION OF N-112)           | 1979    | POWERKHEDA    |
| 49 | NI5643          | NEW THATCH /D221 NI 284-S               | —       | NIPHAD        |
| 50 | NP715           | NP 710'S'                               | —       | NEW DELHI     |
| 51 | NP809           | DO/C 518/SPP//NP 114/3/WIS 245'S'       | —       | SHIMLA        |
| 52 | NP818           | DO/E518//SPP/NP114/3/WIS245'S'          | 1965    | SHIMLA        |
| 53 | NP824           | WIS245'S'/NP 165//NP 770/3/C 518NP 165  | 1960S   | NEW DELHI     |
| 54 | NP825           | NP 824'S'                               | 1960S   | NEW DELHI     |
| 55 | NP852           | KF/2*NP 761                             | 1969    | PUSA, BIHAR   |
| 56 | PBW343          | ND/VG 9144//KAL/BB/3/YACO/4/VEE#5-      | 1996    | LUDHIANA PAU  |
| 57 | PBW550          | WH594/RAJ3858//W485                     | 2007    | LUDHIANA PAU  |
| 58 | PBW613          | PBW438/343//PBW457 (GERMPLASM)          | —       | LUDHIANA PAU  |
| 59 | PBW621          | KAUZ/ALTAR84/AOS/3/MILAN/KAUZ/4/HUIT ES | 2011-12 | LUDHIANA PAU  |
| 60 | PBW628          | PBW175/PBW396//PBW343 (GERMPLASM)       | —       | LUDHIANA PAU  |
| 61 | RAJ4120         | PBW343/V1                               | 2008    | DURGAPURA     |
| 62 | SAFEDLER MA     | Y50/N10B//L52/3/3*LR                    | 1968    | IARI NEWDELHI |
| 63 | SHARBATI SONORA | AMBER MUTANT OF SON.64                  | 1969    | N.DELHI       |
| 64 | SONALIK A       | II54-388/AN/3/YT54/N10B/LR64            | 1965    | NEW DELHI     |
| 65 | UAS315          | DWR163/DHARWAD DRY//DWR225              | 1973    | UAS DHARWAD   |
| 66 | UP215           | TZPP*SON.64                             | 1975    | PANTNAGAR     |
| 67 | UP2771          | HPW89/UP2520//UP2382                    | —       | UTTAR PRADESH |
| 68 | UP2772          | UP2425/VL721                            | —       | UTTAR PRADESH |
| 69 | VL401           | PENJAMO (TRIGOENANO)SELECTION           | 1978    | ALMORA        |
| 70 | VL616           | SKA/CPAN 1507                           | 1986    | ALMORA        |
| 71 | VL829           | IBWSN 149/CPAN 2099                     | 2003    | ALMORA        |
| 72 | VL916           | VW9917/ID13.1/MLT                       | 2007-08 | ALMORA VPKAS  |
| 73 | VL921           | VEE/SNB//BUC/PVN/3/DARU                 | 2007-08 | ALMORA VPKAS  |
| 74 | VL924           | PBW373/VL795                            | 2008-09 | ALMORA VPKAS  |
| 75 | VL925           | BPRE'S//CNO'S//GLL/HD 30//VL 804        | 2008-09 | ALMORA VPKAS  |

|    |               |                                                                    |         |                   |
|----|---------------|--------------------------------------------------------------------|---------|-------------------|
| 76 | VL934         | UP 2425/PCK/TTM'S'                                                 | 2008-09 | ALMORA<br>VPKAS   |
| 77 | VL935         | VL804/UP2425                                                       | 2008-09 | ALMORA<br>VPKAS   |
| 78 | WH1061        | WEAWER/WL2926//SW89.3064 (GERMPLASM)                               | —       | HISAR<br>(CCSHAU) |
| 79 | WH1062        | WEAWER/WL2926//SW89.3064 (GERMPLASM)                               | —       | HISAR<br>(CCSHAU) |
| 80 | WH1073        | JVP/ZP/COL/3/PVN/4/PEN/5/BOW/BUC/BUL/6/<br>VEE #5/DOVE/BUC/7/WH291 | 2007-08 | HISAR<br>(CCSHAU) |
| 81 | WH1081        | 218tSAWSAN171                                                      | 2008-09 | HISAR<br>(CCSHAU) |
| 82 | WWONIR2<br>05 | GERMPLASM                                                          | —       | —                 |

Supplemental Table 3. Primers used for amplification of puroindoline genes in Indian wheat cultivars

| Primer Name   | Primer Sequence (5'-3')  | Tm (°C) | Product length (bp) | References              |
|---------------|--------------------------|---------|---------------------|-------------------------|
| Pina-D1_F IV  | CATCTATTCATCTCCACCTGC    | 61.1    | 520                 | Lilemo et al., 2006     |
| Pina-D1_R IV  | GTGACAGTTTATTAGCTAGT     | 47.7    |                     |                         |
| pin a-D1_F    | CCCTGTAGAGACAAAGCTAA     | 56.2    | 480                 | Massa et al., 2004      |
| pin a-D1_R    | TCACCAGTAATAGCCAATAGTG   | 58.2    |                     |                         |
| Pina-D1_F-III | ATGAAGGCCCTCTTCCTCA      | 63.7    | 330                 | Gautier et al., 1994    |
| Pina-D1_R III | TCACCAGTAATAGCCAATAGTG   | 58.2    |                     |                         |
| Pinb-D1_FII   | AATAAAGGGGAGCCTCAACC     | 63.0    | 530                 | Tranquilli et al., 2002 |
| Pinb-D1_RII   | CGAATAGAGGCTATATCATCACCA | 62.8    |                     |                         |
| pinb-D1_FI    | ATGAAGACCTTATTCCTCCTA    | 55.9    | 480                 | Tranquilli et al., 2002 |
| pinb-D1_RI    | TCACCAGTAATAGCCACTAGGGAA | 64.5    |                     |                         |

Supplementary Table 4. Comparative analysis of 82 cultivars for Grain hardness, moisture, weight and diametre

| Sr. No. | Variety Name | Grain Hardness | Grain Moisture | Grain Weight | Grain Diametre |
|---------|--------------|----------------|----------------|--------------|----------------|
|         |              | Mean±S.E.      | Mean±S.E.      | Mean±S.E.    | Mean±S.E.      |
| 1       | A 115        | 79.490±1.401   | 13.370±0.429   | 42.680±1.764 | 3.160±0.535    |
| 2       | A 90         | 91.240±1.061   | 8.990±0.850    | 25.320±0.605 | 2.650±0.269    |
| 3       | AGRALOCAL    | 77.890±1.414   | 10.990±0.396   | 45.420±0.511 | 3.080±0.341    |
| 4       | AKW318       | 60.000±4.117   | 10.570±0.597   | 51.720±1.693 | 3.060±0.243    |
| 5       | C306         | 95.000±1.495   | 8.700±1.294    | 25.420±0.609 | 2.950±0.298    |
| 6       | CHHOTI LERMA | 31.150±1.002   | 13.200±0.761   | 35.600±0.860 | 2.600±0.251    |
| 7       | DBW 17       | 77.720±2.500   | 13.830±0.700   | 44.760±0.876 | 3.070±0.127    |
| 8       | DBW 39       | 82.510±0.992   | 9.870±0.235    | 35.340±2.140 | 3.290±0.263    |
| 9       | DBW46        | 85.330±1.540   | 9.720±0.659    | 34.680±2.518 | 2.880±0.327    |
| 10      | DHT12        | 101.860±1.023  | 13.260±0.620   | 37.070±0.834 | 2.820±0.297    |
| 11      | DHT23        | 69.710±2.244   | 10.740±0.610   | 39.980±0.963 | 3.050±0.491    |
| 12      | DLLR35       | 23.000±1.004   | 11.330±0.520   | 41.300±1.090 | 2.930±0.214    |
| 13      | GW 89        | 33.550±2.844   | 10.410±0.814   | 47.960±2.427 | 2.990±0.429    |
| 14      | H867         | 25.000±1.601   | 10.930±1.169   | 46.470±1.533 | 3.100±0.291    |
| 15      | HB208        | 51.070±1.176   | 10.110±0.920   | 58.680±1.274 | 3.160±0.119    |
| 16      | HD 2135      | 78.000±2.296   | 10.230±0.810   | 42.830±0.551 | 2.880±0.103    |
| 17      | HD2967       | 83.000±0.872   | 10.340±0.700   | 44.320±0.686 | 2.980±0.217    |
| 18      | HD3002       | 84.990±1.118   | 9.550±1.427    | 33.970±2.275 | 2.880±0.133    |
| 19      | HD3014       | 86.320±1.635   | 9.090±0.853    | 31.110±0.667 | 2.790±0.353    |
| 20      | HPW251       | 84.970±1.861   | 8.860±0.505    | 32.510±2.211 | 2.770±0.110    |
| 21      | HPW296       | 73.070±1.838   | 13.070±0.566   | 44.110±1.063 | 3.070±0.270    |
| 22      | HS 113       | 70.660±1.745   | 9.120±0.977    | 27.030±0.517 | 2.600±0.122    |
| 23      | HS 277       | 73.300±2.989   | 9.410±0.357    | 24.590±1.095 | 2.520±0.154    |
| 24      | HS 295       | 75.150±2.023   | 9.310±1.285    | 28.940±1.701 | 2.800±0.140    |
| 25      | HS1138       | 70.660±0.863   | 9.120±0.909    | 27.030±0.517 | 2.600±0.200    |
| 26      | HS490        | 41.000±1.442   | 10.230±1.084   | 45.340±0.685 | 2.870±0.240    |
| 27      | HS505        | 78.570±1.261   | 8.980±0.883    | 32.460±0.982 | 2.880±0.210    |
| 28      | HS508        | 75.650±1.850   | 9.210±0.677    | 40.510±0.563 | 3.110±0.125    |
| 29      | HS512        | 79.450±2.159   | 9.310±1.620    | 30.900±0.891 | 2.730±0.056    |
| 30      | HS513        | 85.720±2.741   | 8.190±0.449    | 23.830±0.650 | 2.510±0.166    |
| 31      | HUW12        | 83.670±3.673   | 8.870±1.143    | 30.920±0.825 | 2.700±0.068    |
| 32      | HW5210       | 76.300±1.223   | 12.940±0.550   | 49.850±1.111 | 3.130±0.136    |
| 33      | HUW612       | 83.670±1.919   | 8.870±0.693    | 30.920±0.570 | 2.700±0.136    |
| 34      | HYB 11       | 59.670±1.384   | 11.070±0.639   | 45.610±1.097 | 2.890±0.254    |
| 35      | HYB 65       | 59.370±2.520   | 11.100±0.790   | 51.220±1.136 | 3.280±0.199    |
| 36      | K 53         | 81.300±1.198   | 9.320±0.497    | 33.170±1.480 | 2.850±0.232    |

|    |                    |              |              |              |             |
|----|--------------------|--------------|--------------|--------------|-------------|
| 37 | K65                | 91.570±2.583 | 9.600±0.430  | 47.510±1.357 | 3.310±0.295 |
| 38 | K 816              | 75.480±1.421 | 9.130±0.510  | 31.160±1.240 | 2.710±0.129 |
| 39 | K0307(SHATABDI)    | 87.310±0.990 | 9.370±0.436  | 30.430±1.045 | 2.840±0.195 |
| 40 | KO607              | 76.430±1.611 | 9.590±0.602  | 32.390±0.788 | 2.820±0.318 |
| 41 | KO710              | 95.080±2.214 | 9.290±0.978  | 30.580±0.686 | 2.880±0.261 |
| 42 | KSML3              | 80.360±1.924 | 9.510±0.467  | 30.890±1.143 | 2.780±0.135 |
| 43 | LOK1               | 87.200±1.971 | 9.130±0.604  | 31.160±0.681 | 2.890±0.314 |
| 44 | MACS6222           | 76.190±2.237 | 9.480±0.416  | 32.480±0.552 | 2.960±0.167 |
| 45 | NARMADA 112        | 61.380±2.965 | 10.720±1.283 | 56.670±1.429 | 3.470±0.160 |
| 46 | NARMADA 195        | 74.510±1.907 | 10.430±0.891 | 57.890±0.893 | 3.510±0.165 |
| 47 | NARMADA 4          | 74.190±2.148 | 10.480±0.506 | 50.760±0.865 | 3.230±0.290 |
| 48 | NI 5643            | 82.080±1.533 | 11.460±0.476 | 37.540±1.853 | 2.910±0.098 |
| 49 | NP 715             | 76.230±1.183 | 9.450±0.511  | 30.910±1.096 | 2.820±0.171 |
| 50 | NP 818             | 73.260±2.394 | 9.420±0.360  | 52.260±3.009 | 2.750±0.290 |
| 51 | NP 824             | 76.190±1.064 | 9.180±1.026  | 32.480±1.172 | 2.860±0.081 |
| 52 | NP 825             | 81.400±1.712 | 9.110±1.490  | 30.690±1.180 | 2.760±0.136 |
| 53 | NP 852             | 84.490±0.901 | 9.150±0.332  | 31.350±1.211 | 2.870±0.155 |
| 54 | NP809              | 44.380±1.312 | 9.380±1.100  | 30.520±1.178 | 2.840±0.183 |
| 55 | NAPHAL             | 28.370±1.941 | 10.230±1.288 | 34.560±0.893 | 2.900±0.064 |
| 56 | PBW 343            | 80.890±1.412 | 9.450±1.020  | 33.580±1.888 | 2.960±0.161 |
| 57 | PBW 550            | 78.500±1.784 | 9.080±1.067  | 35.040±1.078 | 3.000±0.064 |
| 58 | PBW613             | 77.140±1.047 | 9.150±0.737  | 36.510±0.865 | 2.890±0.032 |
| 59 | PBW621             | 77.230±2.771 | 9.380±0.856  | 33.040±2.534 | 3.400±0.211 |
| 60 | PBW628             | 86.120±1.588 | 9.200±0.424  | 30.650±1.181 | 2.670±0.103 |
| 61 | RAJ 4120           | 78.900±1.201 | 9.370±0.704  | 38.930±1.134 | 3.080±0.137 |
| 62 | SAFED LERMA        | 28.000±2.731 | 12.830±0.886 | 35.840±0.953 | 2.700±0.258 |
| 63 | SHARBATI<br>SONORA | 57.700±1.317 | 11.230±0.734 | 36.510±0.924 | 2.710±0.064 |
| 64 | SONALIKA           | 59.300±1.451 | 11.460±1.432 | 37.540±1.312 | 2.870±0.131 |
| 65 | UAS315             | 79.540±2.026 | 9.230±0.689  | 31.050±1.303 | 2.760±0.157 |
| 66 | UP 215             | 74.180±2.603 | 8.980±0.420  | 31.900±0.587 | 2.860±0.110 |
| 67 | UP2771             | 79.470±1.999 | 9.530±0.495  | 33.020±0.823 | 2.830±0.136 |
| 68 | UP2772             | 82.510±1.038 | 9.030±0.525  | 52.510±2.591 | 2.730±0.165 |
| 69 | VL 401             | 66.200±1.850 | 11.620±0.444 | 51.490±1.241 | 3.100±0.127 |
| 70 | VL 616             | 73.070±2.127 | 9.080±0.806  | 36.750±0.927 | 3.150±0.100 |
| 71 | VL 829             | 84.340±2.891 | 9.390±1.282  | 31.290±0.958 | 2.820±0.105 |
| 72 | VL916              | 82.400±1.575 | 11.880±0.415 | 34.880±1.344 | 2.940±0.062 |
| 73 | VL921              | 80.890±0.875 | 9.240±0.443  | 34.770±0.853 | 2.950±0.085 |
| 74 | VL924              | 89.090±3.406 | 8.670±1.125  | 27.360±1.478 | 2.680±0.053 |
| 75 | VL925              | 78.970±1.171 | 9.180±0.841  | 35.440±0.944 | 2.960±0.335 |
| 76 | VL934              | 70.660±1.199 | 9.450±0.815  | 27.080±1.344 | 2.680±0.047 |
| 77 | VL935              | 71.460±1.086 | 9.190±1.572  | 44.890±0.917 | 3.040±0.046 |

|    |           |              |              |              |             |
|----|-----------|--------------|--------------|--------------|-------------|
| 78 | WH1061    | 73.173±2.586 | 9.190±0.987  | 42.000±1.640 | 3.050±0.083 |
| 79 | WH1062    | 76.483±0.423 | 9.160±0.730  | 36.490±1.198 | 2.910±0.036 |
| 80 | WH1073    | 76.583±0.422 | 9.310±0.983  | 31.810±1.617 | 2.910±0.070 |
| 81 | WH1081    | 76.673±0.422 | 9.410±0.290  | 38.280±3.538 | 2.977±0.172 |
| 82 | WWONIR205 | 64.000±2.050 | 11.930±1.401 | 29.990±1.338 | 2.480±0.076 |
|    | C.D.      | 5.289        | 2.364        | 3.786        | N/A         |
|    | SE(m)     | 1.892        | 0.846        | 1.355        | 0.208       |
|    | SE(d)     | 2.676        | 1.196        | 1.916        | 0.295       |
|    | C.V.      | 4.523        | 14.631       | 6.319        | 12.406      |

C.V. - Coefficient of variation

SE- Standard error
